# Supplementary material for: Thermocatalytic syntheses of highly defective hybrid nano-catalysts for photocatalytic hydrogen evolution
Source: Royal Society of Chemistry journal article supplement (doi:10.1039/c7ta07808k), 2017-01-01
Supplement: c7ta07808k1.pdf [file c7ta07808k1.pdf]

## Electronic Supplementary Information for

### Thermocatalytic Syntheses of Highly Defective Hybrid Oxide Nanocatalysts for Photocatalytic Hydrogen evolution

Xiaole Weng,<sup>a</sup> Yili Zhang,<sup>a</sup> Feng Bi,<sup>a</sup> Fan Dong,<sup>b</sup> Zhongbiao Wu<sup>a,\*</sup> and Jawwad A. Darr<sup>c,\*</sup>

<sup>a</sup> Key Laboratory of Environment Remediation and Ecological Health, Ministry of Education, College of Natural Resources and Environmental Science, Zhejiang University, Zhejiang Provincial Engineering Research Center of Industrial Boiler & Furnace Flue Gas Pollution Control, 388 Yuhangtang Road, Hangzhou, 310058, P. R. China. Fax/Tel: 0086 571 8795308; E-mail: zbwu@zju.edu.cn.

<sup>b</sup> Chongqing Technology & Business University, College of Environmental & Biological Engineering, Chongqing, 400067, P. R. China.

<sup>c</sup> Department of Chemistry, University College London, Christopher Ingold Laboratories, 20 Gordon Street, London, WC1H 0AJ, UK.

#### \*Corresponding Authors

Prof. Zhongbiao Wu, E-mail: zbwu@zju.edu.cn;

Prof. Jawwad A. Darr, E-mail: [j.a.darr@ucl.ac.uk](mailto:j.a.darr@ucl.ac.uk).

**Table S1** XRD Rietveld refinement result of sc-TiO<sub>2</sub> (S1) and sc-NiO-TiO<sub>2</sub>-N<sub>2</sub> (S2)

| Crystal system | Space group | Lattice parameter |           |           |                       | Structure |    |     |      |           |         |
|----------------|-------------|-------------------|-----------|-----------|-----------------------|-----------|----|-----|------|-----------|---------|
|                |             | a                 | b         | c         | $\alpha=\beta=\gamma$ | Atoms     | x  | y   | z    | occupancy |         |
|                |             |                   |           |           |                       |           |    |     |      |           |         |
| S1             | Tetragonal  | I41/amd           | 3.7909(4) | 3.7909(4) | 9.507(2)              | 90        | Ti | 0   | 0.25 | 0.875     | 1       |
|                |             |                   |           |           |                       |           | O  | 0   | 0.25 | 0.0814    | 1       |
| S2-1           | Tetragonal  | I41/amd           | 3.7875(3) | 3.7875(3) | 9.508(2)              | 90        | Ti | 0   | 0.25 | 0.875     | 1       |
|                |             |                   |           |           |                       |           | O  | 0   | 0.25 | 0.0814    | 0.84(1) |
| S2-2           | Cubic       | Fm-3m             | 4.1816(2) | 4.1816(2) | 4.1816(2)             | 90        | Ni | 0   | 0    | 0         | 1       |
|                |             |                   |           |           |                       |           | O  | 0.5 | 0.5  | 0.5       | 1       |

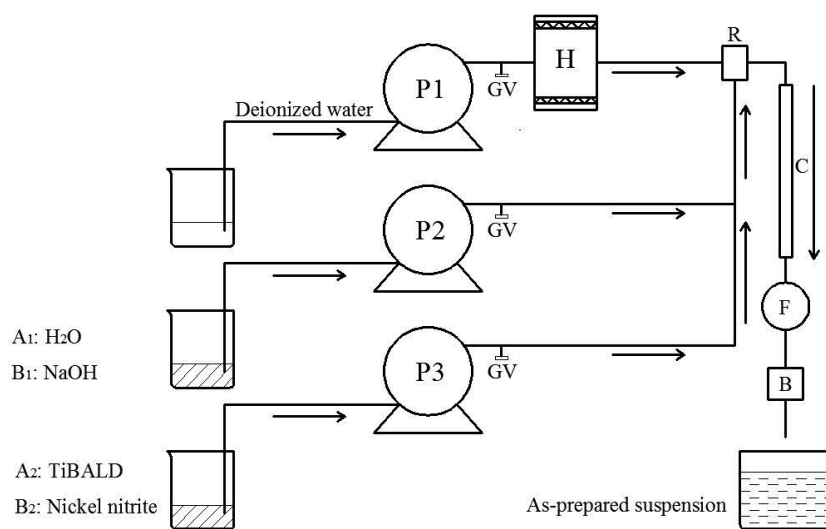

**Fig. S1** Schematic diagram of continuous hydrothermal flow synthesis system (P, pump; GV, globe valve; H, heater; R, reactor; C, cooler; F, filter; B, back pressure valve).

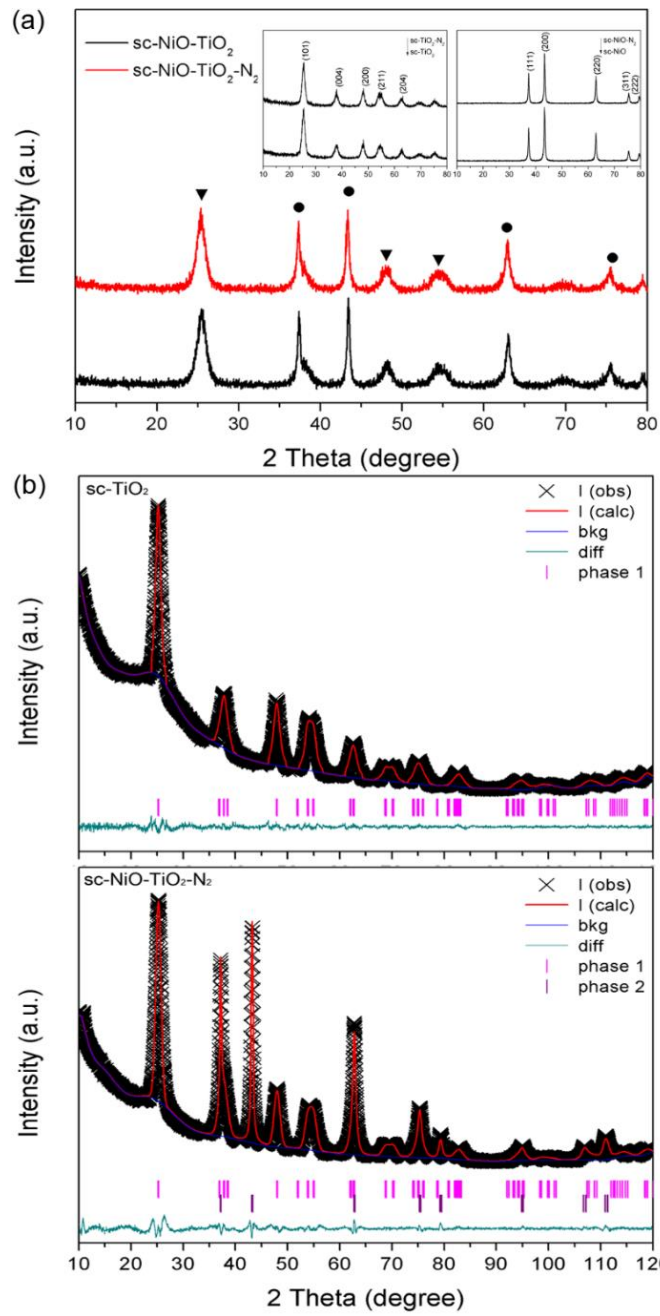

**Fig. S2** (a) XRD patterns of  $sc\text{-TiO}_2$ ,  $sc\text{-TiO}_2\text{-N}_2$ ,  $sc\text{-NiO}$ ,  $sc\text{-NiO-N}_2$ ,  $sc\text{-NiO-TiO}_2$ ,  $sc\text{-NiO-TiO}_2\text{-N}_2$  and (b) XRD Rietveld refinement of  $sc\text{-TiO}_2$  and  $sc\text{-NiO-TiO}_2\text{-N}_2$  (I(obs): observed intensity; I(calc): calculated intensity; bkg: background; diff: difference;  $\blacktriangledown$  (or phase 1):  $\text{TiO}_2$ ;  $\bullet$  (or phase 2):  $\text{NiO}$ )

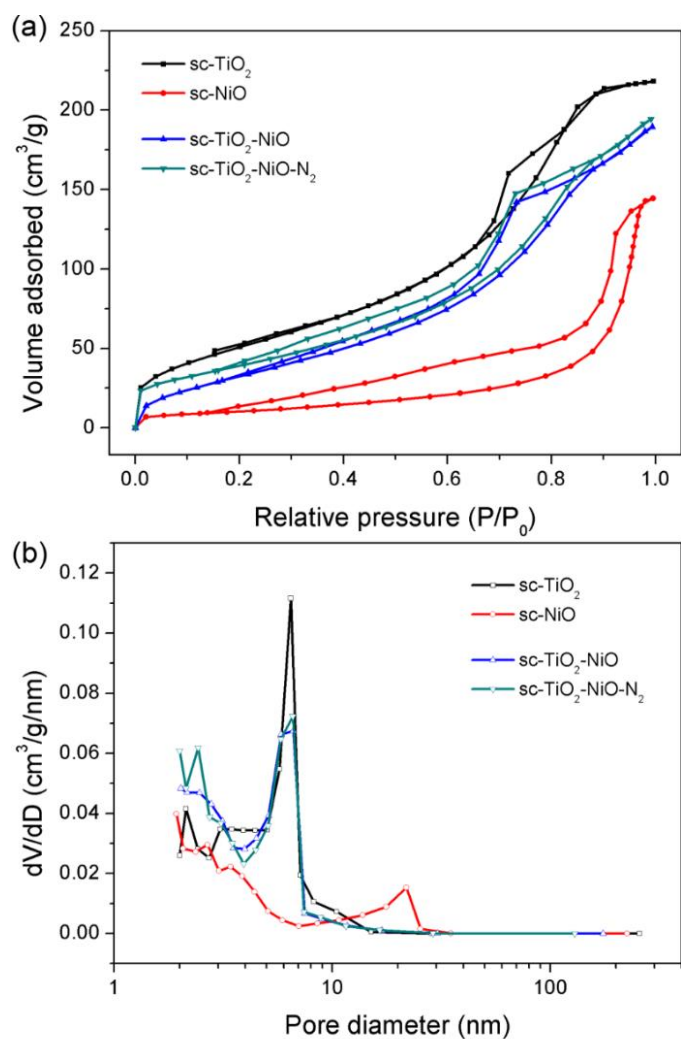

**Fig. S3** (a) Adsorption isotherm and (b) pore size distribution of sc-TiO<sub>2</sub>, sc-NiO, sc-NiO-TiO<sub>2</sub> and sc-NiO-TiO<sub>2</sub>-N<sub>2</sub> samples.

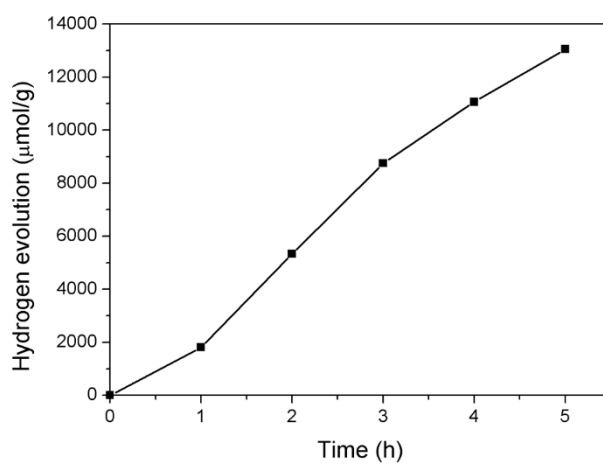

**Fig. S4** Photocatalytic activities of 0.1wt% Pt doped sc-NiO-TiO<sub>2</sub>-N<sub>2</sub> powders at room temperature.

## Computational Methods

The reported calculation of energy band structure and density of states (DOS) of defect-free TiO<sub>2</sub> and defective TiO<sub>2</sub> were performed using a first-principle density functional theory (DFT).<sup>1-3</sup> The generalized gradient approximation proposed by Perdew, Burk and Ernzerhof (GGA-PBE)<sup>4, 5</sup> settled in CASTEP (Cambridge Serial Total Energy Package) was selected. To make the result more representative, defect-free and defective TiO<sub>2</sub> models for calculation were obtained from Crystallography Open Database. According to our XRD Rietveld refinement results (see **Table S1**), TiO<sub>2</sub> with COD ID of No. 9015929<sup>6</sup> and No. 9008215<sup>7</sup> were employed as the primitive cells for defect-free and defective TiO<sub>2</sub> calculation, respectively. A (2×3×1) supercell with 47 titanium atoms and 70 oxygen atoms (Ti<sub>47</sub>O<sub>70</sub>) were then built for the simulations of defect-free TiO<sub>2</sub> (see **Figure S5(a)**), while the supercell with 47 titanium atoms and 69, 67 and 60 oxygen atoms (Ti<sub>47</sub>O<sub>69</sub>, Ti<sub>47</sub>O<sub>67</sub>, Ti<sub>47</sub>O<sub>60</sub>) were built for defective TiO<sub>2</sub> (see **Fig. S5(b-d)**). In defective TiO<sub>2</sub>, oxygen were mostly removed from the surface of the supercell, for oxygen vacancies in sc-NiO-TiO<sub>2</sub>-N<sub>2</sub> catalysts mainly existed on the surface of TiO<sub>2</sub>. Parameters during the simulation were set referred to the literature reported by Wu *et al.*<sup>8</sup> and our experimental results. The Tkatchenko-Scheffler method for DFT-D correction was used through out.<sup>9</sup> The energy cutoff was set at 400 eV, with the FFT grid of 48×48×48. The SCF tolerance and k-point were set as 10<sup>-6</sup> eV/atom and 1×1×2, respectively. Moreover, a norm-conserving pseudopotential was chosen for its high accuracy.<sup>10, 11</sup>

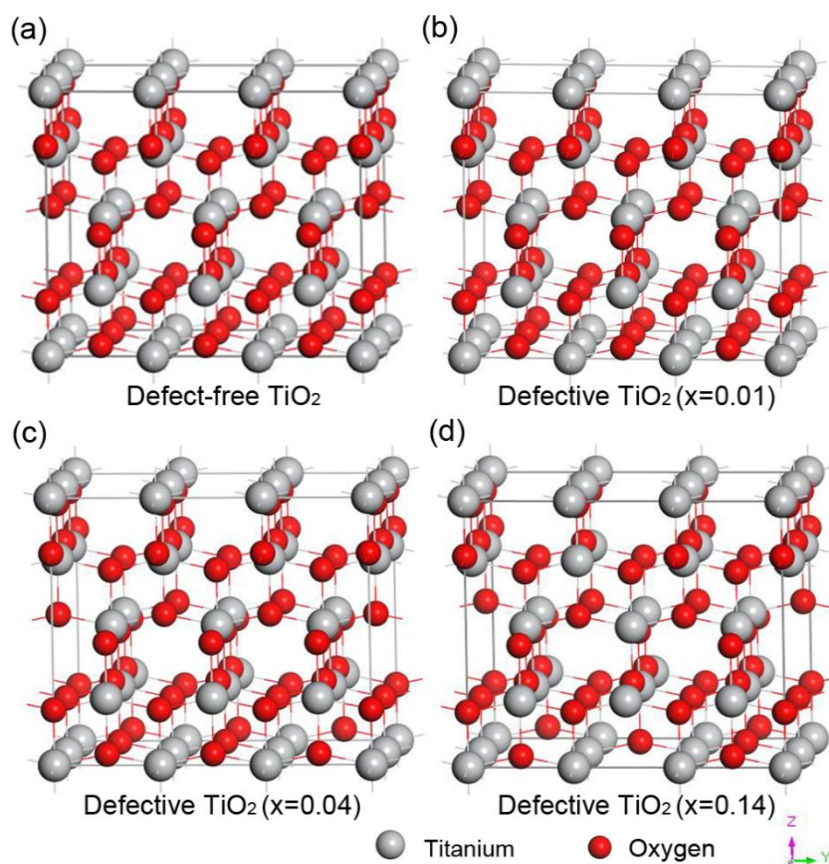

**Fig. S5** Structure of (a) defect-free  $\text{TiO}_2$  and (b-d) defective  $\text{TiO}_2$  ( $x=0.01$ ,  $0.04$  and  $0.14$ ) used for calculation of band structure and PDOS.

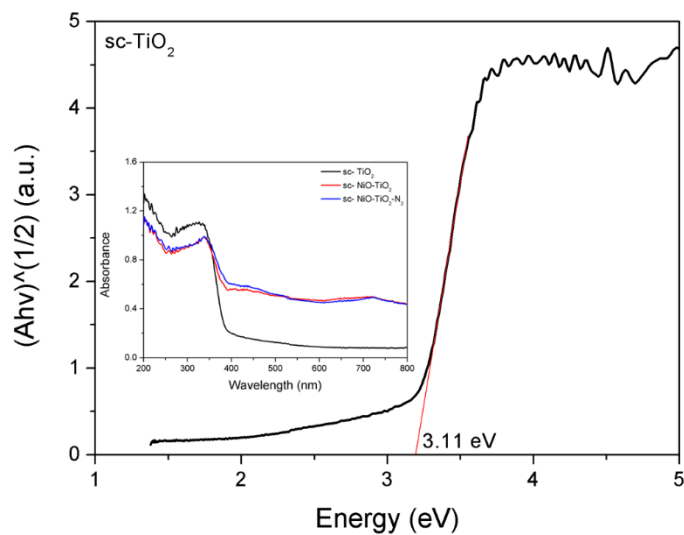

**Fig. S6** UV-Vis spectra of sc- $\text{TiO}_2$ , sc-NiO- $\text{TiO}_2$  and sc-NiO- $\text{TiO}_2$ - $\text{N}_2$ , and calculated band gap of defect-free sc- $\text{TiO}_2$ .

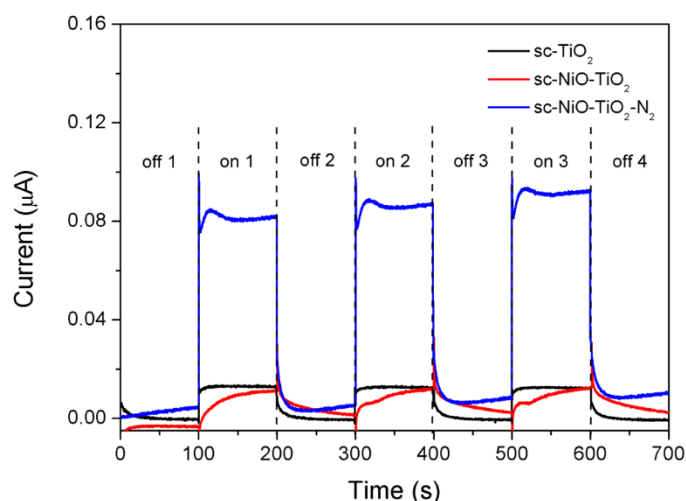

**Fig S7.** Transient photocurrents of  $\text{sc-TiO}_2$ ,  $\text{sc-NiO-TiO}_2$  and  $\text{sc-NiO-TiO}_2\text{-N}_2$  under visible-light irradiation.

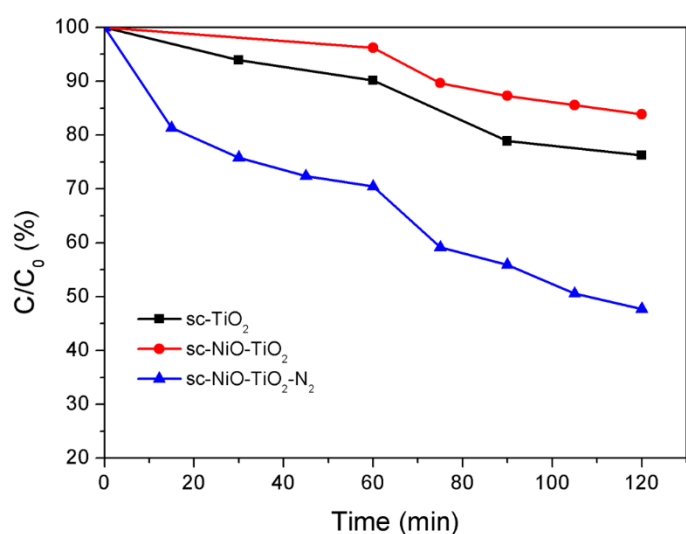

**Fig. S8** Visible-light photocatalytic toluene oxidation activities of  $\text{sc-TiO}_2$ ,  $\text{sc-NiO-TiO}_2$  and  $\text{sc-NiO-TiO}_2\text{-N}_2$ .

### XPS Analysis

**Fig. S9(a)** refers to Ni 2p spectra of  $\text{NiO-TiO}_2$  (before and after  $\text{N}_2$  treatment). Before heating, peaks at 853.5eV, 855.1 eV and 860.7 eV, assigned to the characteristic peaks of NiO, were clearly observed<sup>12</sup>. For  $\text{NiO-TiO}_2\text{-N}_2\text{-300 } ^\circ\text{C}$  hybrids, peaks at 853.2 eV, 854.9 eV and 860.2 eV belonging to Ni  $2p_{3/2}$ , and 870.6 eV、871.6 eV、878.7 eV for Ni $2p_{1/2}$  were surveyed. The energy differences between 853.2 eV (belongs to Ni $2p_{3/2}$ ) and 870.6 eV (belongs to Ni $2p_{1/2}$ ) was 17.4 eV, while that between 853.2 eV (belongs to Ni $2p_{3/2}$ ) and 871.6 eV (belongs to Ni $2p_{1/2}$ ) was 18.4 eV, indicating that trace NiO might be reduced and metallic Ni might form instead.<sup>12-14</sup> Compared with  $\text{sc-NiO-TiO}_2$  mixtures, the  $\text{sc-NiO-TiO}_2\text{-N}_2$

N<sub>2</sub> hybrids shifted the Ni2p signal toward a lower value of binding energy for about 0.2 eV. This phenomenon was related to the augment of electron cloud density around Ni atoms, which was in accordance with the formation of metallic Ni.<sup>15</sup> The comparison of Ti2p of sc-NiO-TiO<sub>2</sub> and sc-NiO-TiO<sub>2</sub>-N<sub>2</sub> is shown in **Fig. S9(b)**. The Ti2p<sub>3/2</sub> peak of sc-NiO-TiO<sub>2</sub>-N<sub>2</sub> shifted from 458.9 eV to a lower binding energy compared to that of sc-NiO-TiO<sub>2</sub>, indicating the formation of Ti<sup>3+</sup>.<sup>16</sup> **Fig. S9(c)** depicts the O 1s spectra of the samples. For pure TiO<sub>2</sub>, only peaks at 530.0 eV and 531.4 eV, which were assigned to Ti-O lattice oxygen and -OH surface oxygen respectively, were surveyed.<sup>17, 18</sup> For sc-NiO-TiO<sub>2</sub> before N<sub>2</sub> treatment, peak at 529.3 eV in addition to the former ones was observed, which was ascribed to Ni-O lattice oxygen.<sup>14</sup> For sc-NiO-TiO<sub>2</sub>-N<sub>2</sub> hybrids, C 1s signal of Ni-O lattice oxygen was observed at 528.7 eV, indicating that the density of electron cloud around Ni-O bond increased. C1s spectra of the samples was shown in **Fig. S9(d)**. Peaks at 284.8 eV was usually ascribed to adventitious carbon from the instrument, as well as the carbon residues from the incomplete oxidation of lactate species.<sup>19, 20</sup> Peaks at 286.3 eV and 288.6 eV were assigned to C-O and C=O respectively, demonstrating the coverage of carbonate on the surface of particles.<sup>21</sup> For sc-NiO-TiO<sub>2</sub>-N<sub>2</sub> hybrids, the intensity of XPS signal at 288.7 eV was lower than that of TiO<sub>2</sub> and NiO-TiO<sub>2</sub>, indicating that part of the surface carbonate released during the N<sub>2</sub> treatment process. According to ESR spectra, Ni2p spectra and O1s spectra, it can be conjectured that under the radiation of X-ray, free electrons located in the bulk of sc-NiO-TiO<sub>2</sub>-N<sub>2</sub> moved to the surfacial Ti<sup>3+</sup>, Ni<sup>2+</sup> and oxygen vacancies, leading to the formation of the photocurrent.



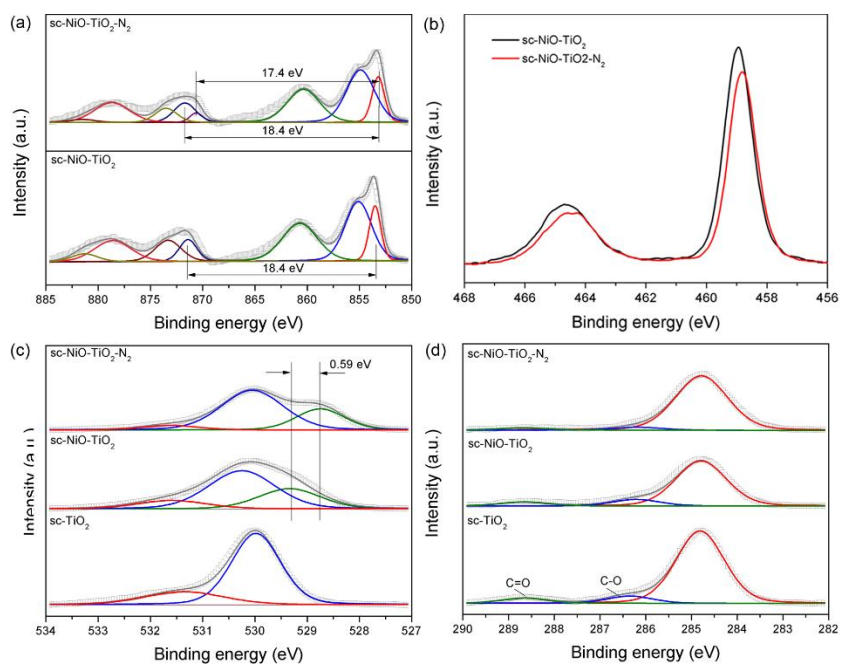

**Fig. S9** XPS spectra of (a) Ni2p, (b) Ti2p, (c) O1s and (d) C1s of selected sc-TiO<sub>2</sub>, sc-NiO-TiO<sub>2</sub> and sc-NiO-TiO<sub>2</sub>-N<sub>2</sub> samples.

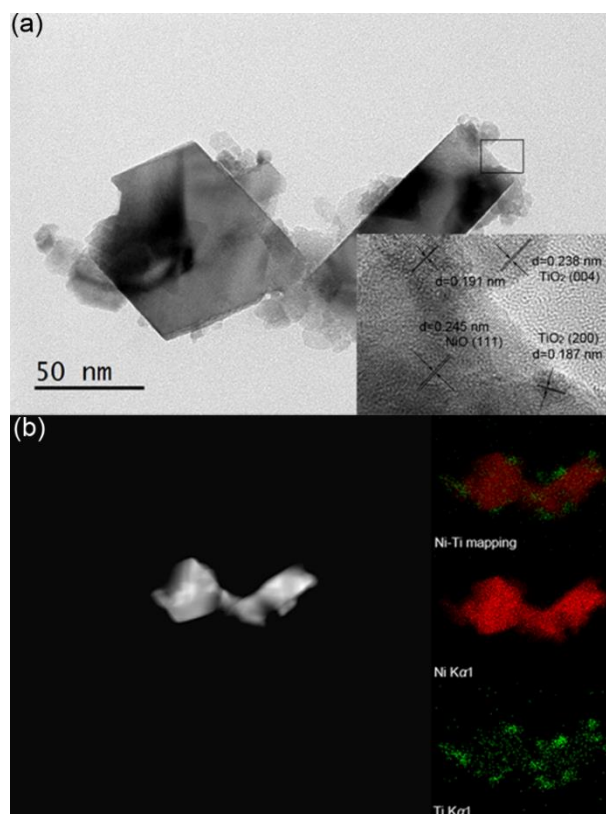

**Fig. S10** (a) HR-TEM and (b) EDX-mapping of sc-NiO-TiO<sub>2</sub>-N<sub>2</sub> sample.

## References

1. M. D. Segall, P. J. D. Lindan, M. J. Probert, C. J. Pickard, P. J. Hasnip, S. J. Clark and M. C. Payne, *J. Phys. - Condens. Matter*, 2002, **14**, 2717-2744.
2. N. Yang, Y. Liu, H. Wen, Z. Tang, H. Zhao, Y. Li, and D. Wang, *ACS Nano* 2013, **7**, 1504-1512.
3. P. J. D. Lindan, N. M. Harrison, M. J. Gillan and J. A. White, *Phys. Rev. B* 1997, **55**, 15919-15927.
4. J. P. Perdew, and W. Yue, *Phys. Rev. B*, 1986, **32**, 8800-8802.
5. J. P. Perdew, K. Burke, M. Ernzerhof, *Phys. Rev. Lett.*, 1996, **77**, 3865-3868.
6. C. J. Howard, T. M. Sabine, and F. Dickson, *Acta Cryst.*, 1991, **B47**, 462-468.
7. M. Horn, C. F. Schwerdtfeger and E. P. Meagher, *Z. Kristallogr.* 1972, **136**, 273-281.
8. M. C. Wu, H. C. Liao, Y. C. Cho, G. Tóth, Y. F. Chen, W. F. Su and K. Kordás, *J. Mater. Chem. A*, 2013, **1**, 5715-5720.
9. A. Tkatchenko and M. Scheffler, *Phys. Rev. Lett.*, 2009, **102**, 073005.
10. L. Kleinman, *Phys. Rev. B*, 1980, **21**, 2630-2631.
11. C. Hartwigsen, S. Goedecker, and J. Hutter, *Phys. Rev. B* 1988, **58**, 3641-3662.
12. H. W. Nesbitt, D. Legrand and G. M. Bancroft, *Phys. Chem. Minerals* 2000, **27**, 357-366.
13. H. Shang, K. Pan, L. Zhang, B. Zhang, and X. Xiang, *Nanomaterials*, 2016, **6**, 103.
14. M. C. Biesinger, B. P. Payne, L. W. M. Lau, A. Gerson and R. S. C. Smart, *Surf. Interface Anal.*, 2009, **41**, 324-332.
15. D. Huang, L. Yin and J. Niu, *Environ. Sci. Technol.* 2016, **50**, 5857-5863.
16. M. Xing, W. Fang, M. Nasir, Y. Ma, J. Zhang and M. Anpo, *J. Catal.*, 2013, **297**, 236-243.
17. G. S. Herman, Z. Dohnalek, N. Ruzycski, and U. Diebold, *J. Phys. Chem. B* 2003, **107**, 2788-2795.
18. H. Choi and M. Kang, *Int. J. Hydrogen Energ.*, 2007, **32**, 3841-3848.
19. P. Wang, P. S. Yap and T. T. Lim, *Appl. Catal. A-Gen.*, 2011, **399**, 252-261.
20. J. Wang, D. N. Tafen, J. P. Lewis, Z. Hong, A. Manivannan, M. Zhi, M. Li, and N. Wu, *J. Am. Chem. Soc.*, 2009, **131**, 12290-11297.
21. B. Liu, L.M. Liu, X. F. Lang, H. Y. Wang, X. W. Lou and E. S. Aydil, *Energ. Environ. Sci.*, 2014, **7**, 2592-2597.
